# Supplementary material for: Chiral ruthenium–terpyridine based metallodendrimers: facile synthesis, characterization, and photophysical studies
Source: Royal Society of Chemistry journal article supplement (doi:10.1039/b206159g), 2002-01-01
Supplement: b206159g.doc [file b206159g.doc]

Chiral Ruthenium-Terpyridine Based Metallodendrimers: Facile Synthesis, Characterization, and Photophysical Studies

Hua Jiang, Sukjoong Lee, and Wenbin Lin*

Department of Chemistry, CB#3290, University of North Carolina, Chapel Hill, North Carolina 27599, U.S.A. [wlin@unc.edu](mailto:wlin@unc.edu)

Figure S1. 1H NMR spectra of **L1**-**L3**.

7.0

8.0

9.0

Figure S2. UV-Vis Spectra of **L1** – **L3**.

Figure S3. Fluorescence spectra of **L1** – **L3**.
